# Supplementary material
Source: publisher figshare collection journal article supplement (https://acs.figshare.com/ndownloader/files/5099500)
Supplement: Supplementary file 1 [file 5099500]

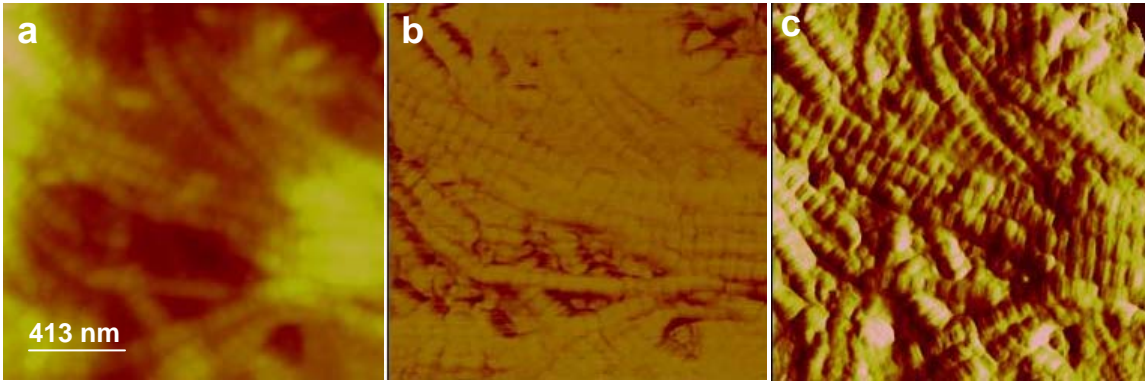

S.1 Tapping mode AFM images in air. Height (a), phase (b), and amplitude images for a region away from the optic nerve. The image was collected from a sample labeled as A1.

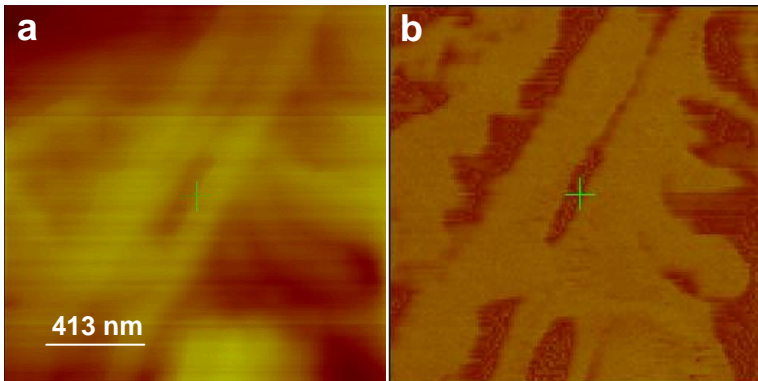

S.2 Topography (a) and a FV image (b) of an area away from the optic nerve. The data was collected from a sample labeled as A1.

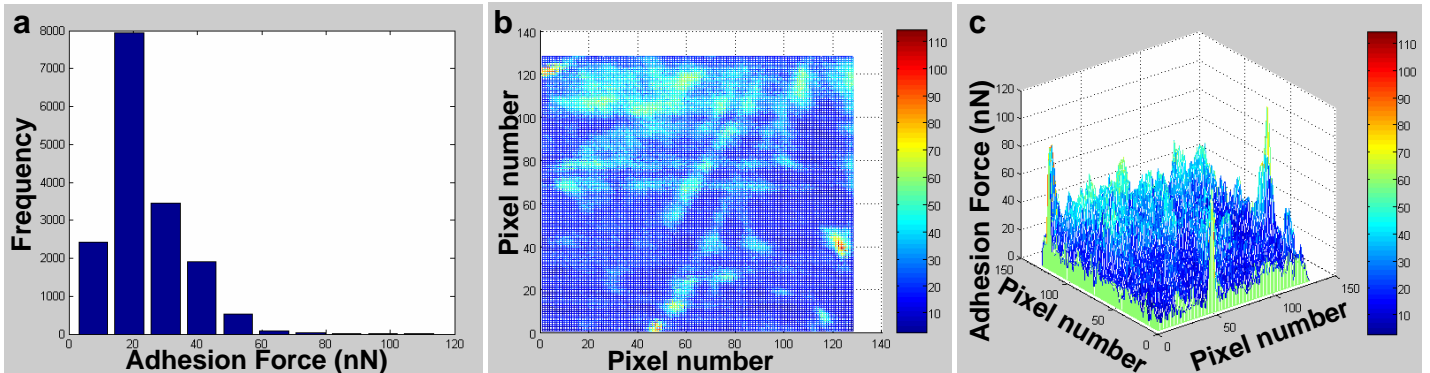

S.3 Part (a) is a histogram showing the distribution of forces extracted from the FV image in figure S.2. Part (b) is the adhesion map for the same FV image. Part (c) is a 3D wireframe plot where the x and y axis correspond to pixel numbers and the z axis to the adhesion force. The color Z scale in parts (b) and (c) is in nN .

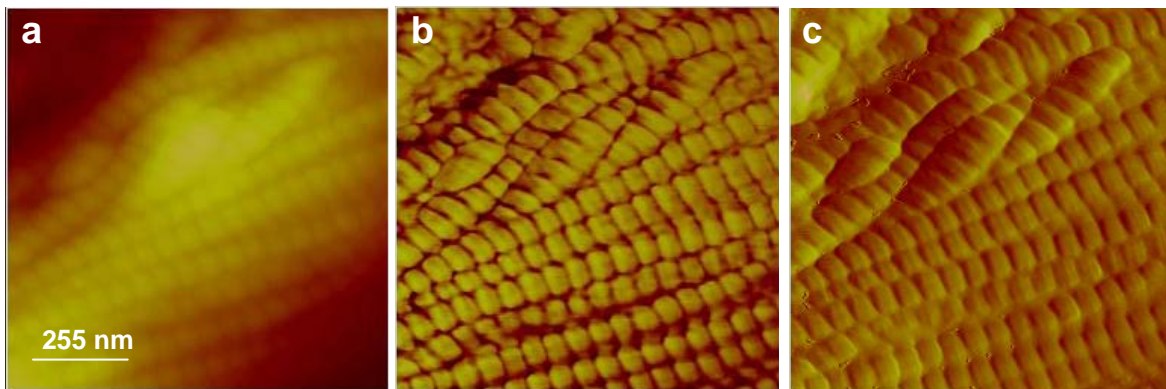

S.4 Tapping mode AFM images in air. Height (a), phase (b), and amplitude images for a region away from the optic nerve. The image was collected from a sample labeled as A2.

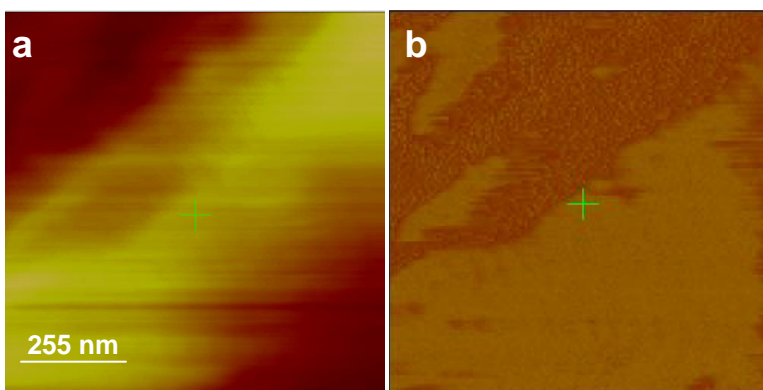

S.5 Topography (a) and a FV image (b) of an area away from the optic nerve. The data was collected from a sample labeled as A2.

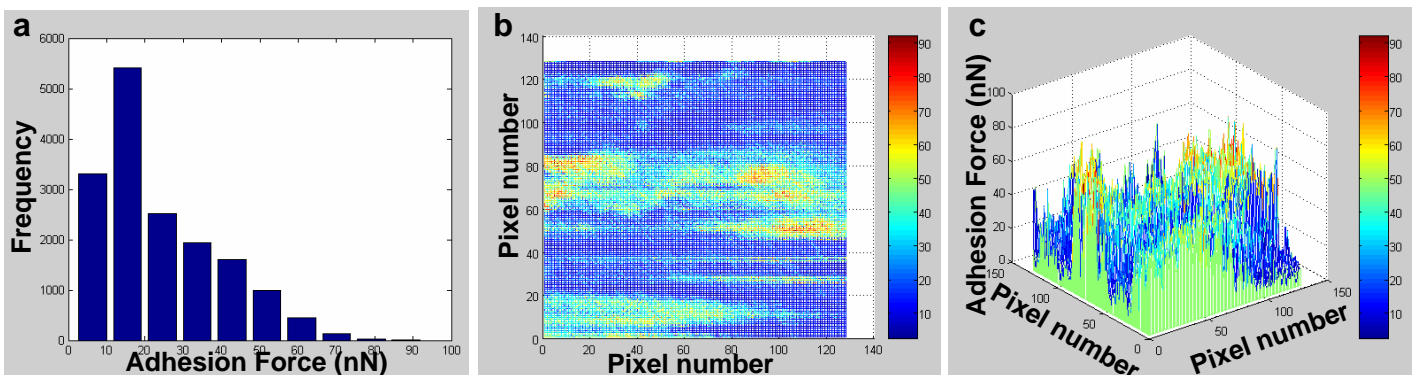

S.6 Part (a) is a histogram showing the distribution of forces extracted from the FV image in figure S.5. Part (b) is the adhesion map for the same FV image. Part (c) is a 3D wireframe plot where the x and y axis correspond to pixel numbers and the z axis to the adhesion force. The color Z scale in parts (b) and (c) is in nN .

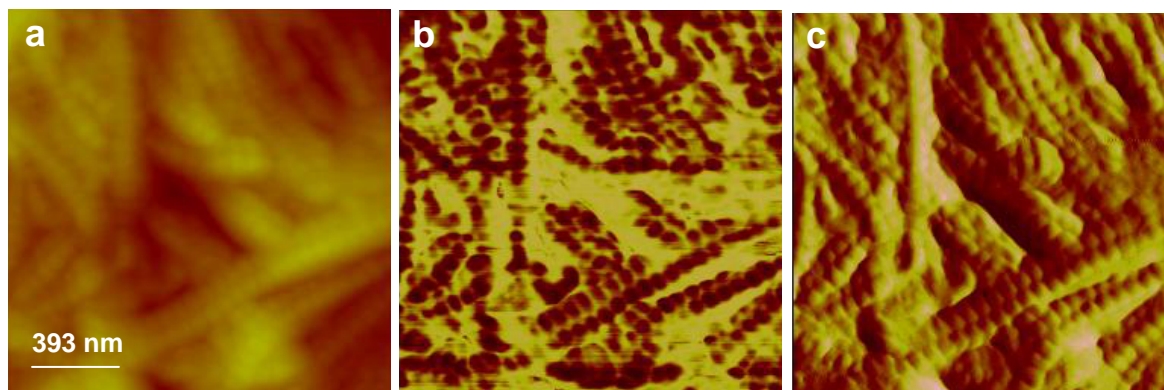

S.7 Tapping mode AFM images in air. Height (a), phase (b), and amplitude images for a region away from the optic nerve. The image was collected from a sample labeled as A3.

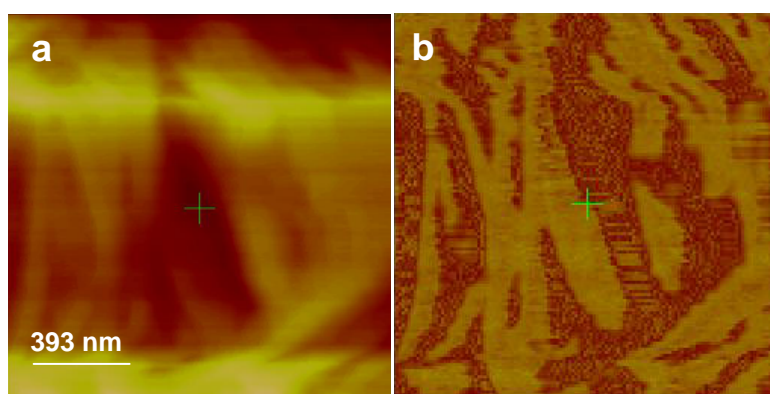

S.8 Topography (a) and a FV image (b) of an area away from the optic nerve. The data was collected from a sample labeled as A3.

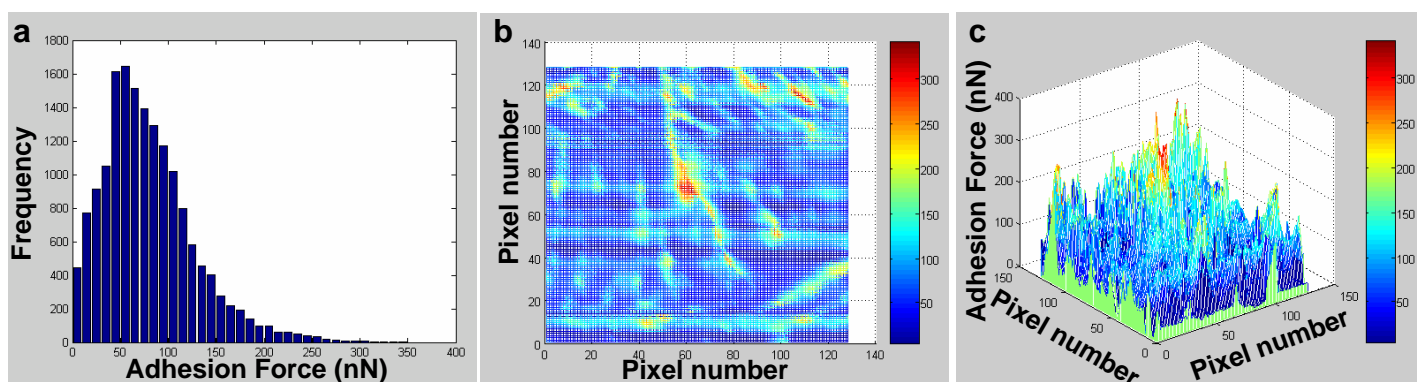

S.9 Part (a) is a histogram showing the distribution of forces extracted from the FV image in figure S.8. Part (b) is the adhesion map for the same FV image. Part (c) is a 3D wireframe plot where the x and y axis correspond to pixel numbers and the z axis to the adhesion force. The color Z scale in parts (b) and (c) is in nN .



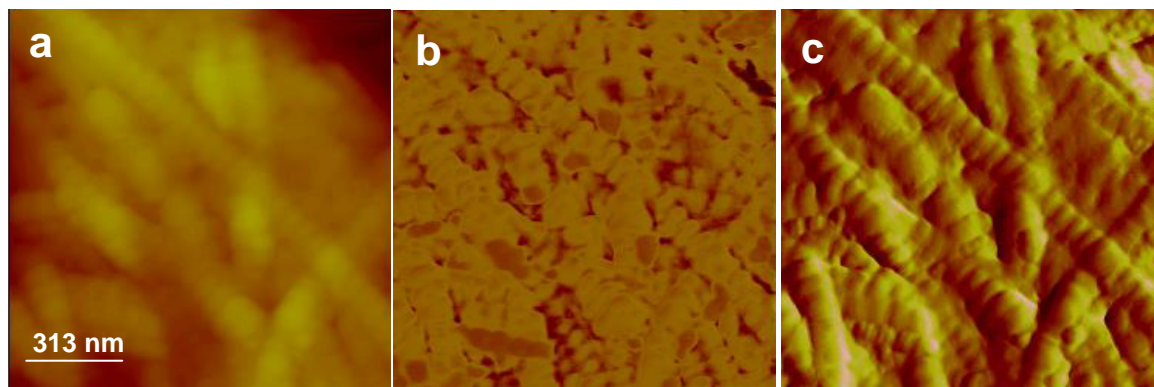

S.10 Tapping mode AFM images in air. Height (a), phase (b), and amplitude images for a region away from the optic nerve. The image was collected from a sample labeled as A4.

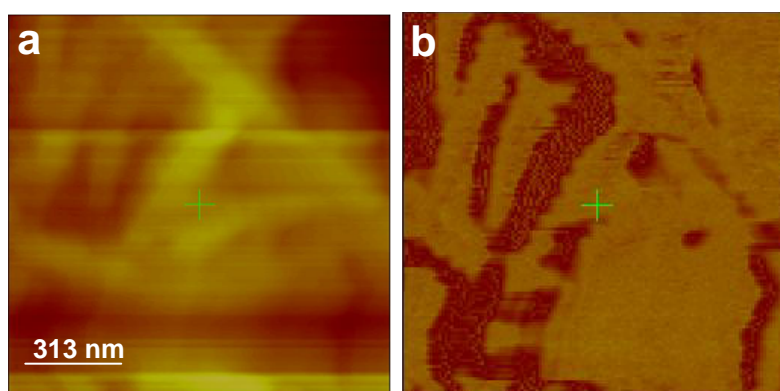

S.11 Topography (a) and a FV image (b) of an area away from the optic nerve. The data was collected from a sample labeled as A4.

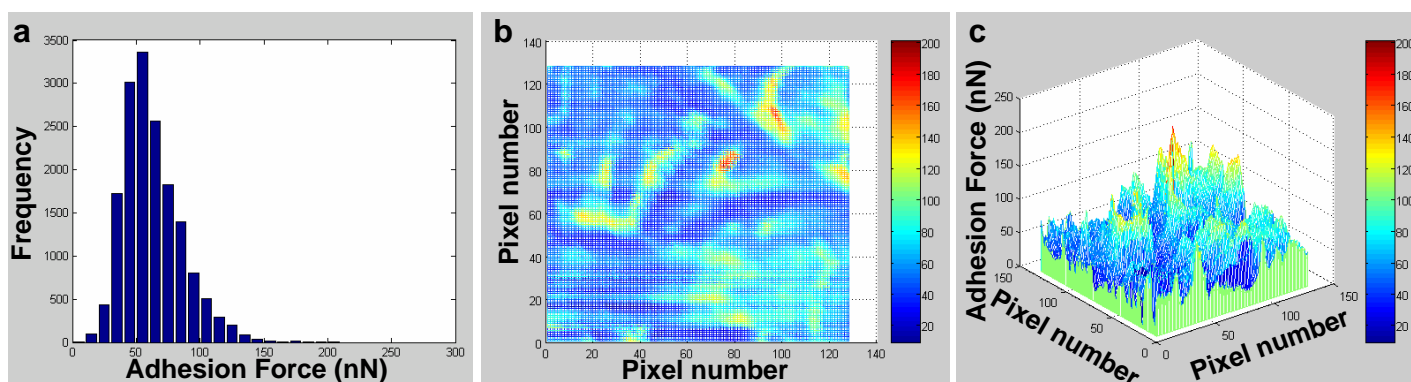

S.12 Part (a) is a histogram showing the distribution of forces extracted from the FV image in figure S.11. Part (b) is the adhesion map for the same FV image. Part (c) is a 3D wireframe plot where the x and y axis correspond to pixel numbers and the z axis to the adhesion force. The color Z scale in parts (b) and (c) is in nN .



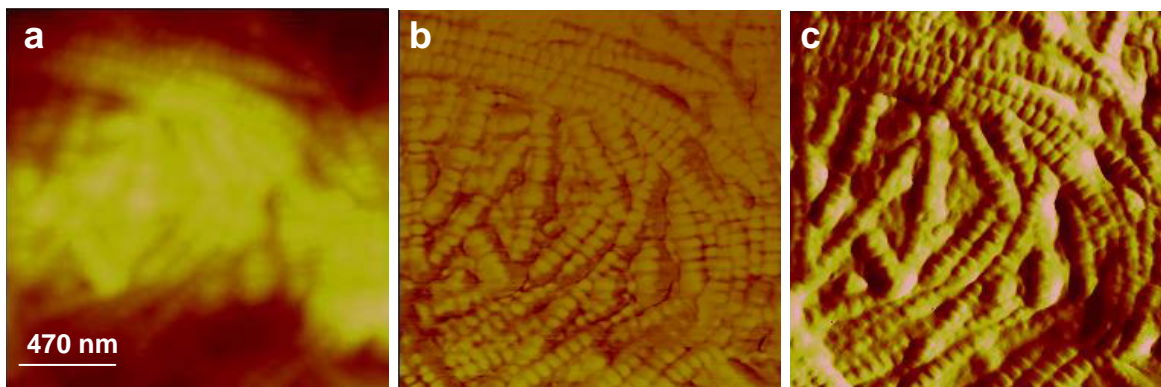

S.13 Tapping mode AFM images in air. Height (a), phase (b), and amplitude images for a region away from the optic nerve. The image was collected from a sample labeled as A5.

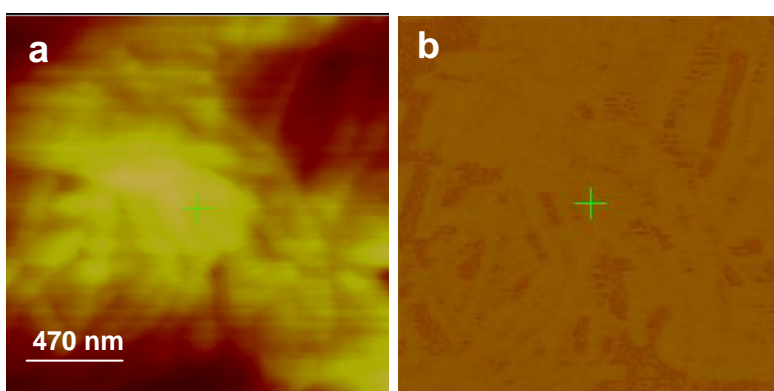

S.14 Topography (a) and a FV image (b) of an area away from the optic nerve. The data was collected from a sample labeled as A5.

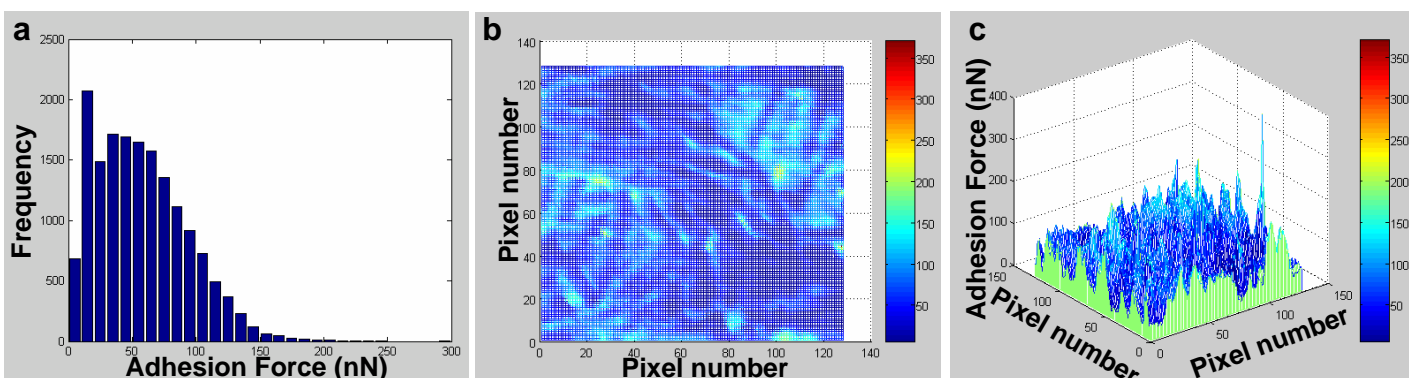

S.15 Part (a) is a histogram showing the distribution of forces extracted from the FV image in figure S.14. Part (b) is the adhesion map for the same FV image. Part (c) is a 3D wireframe plot where the x and y axis correspond to pixel numbers and the z axis to the adhesion force. The color Z scale in parts (b) and (c) is in nN .

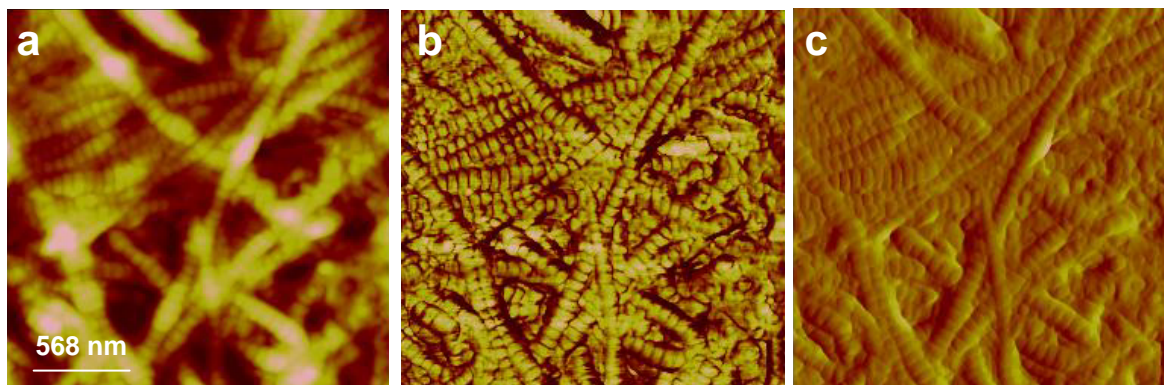

S.16 Tapping mode AFM images in air. Height (a), phase (b), and amplitude images for a region away from the optic nerve. The image was collected from a sample labeled as A6.

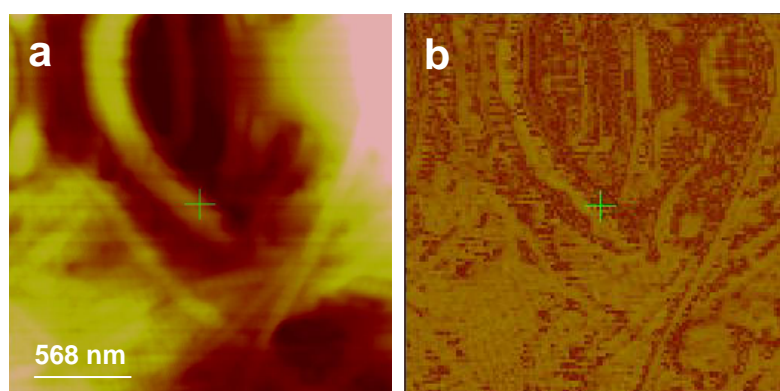

S.17 Topography (a) and a FV image (b) of an area away from the optic nerve. The data was collected from a sample labeled as A6.

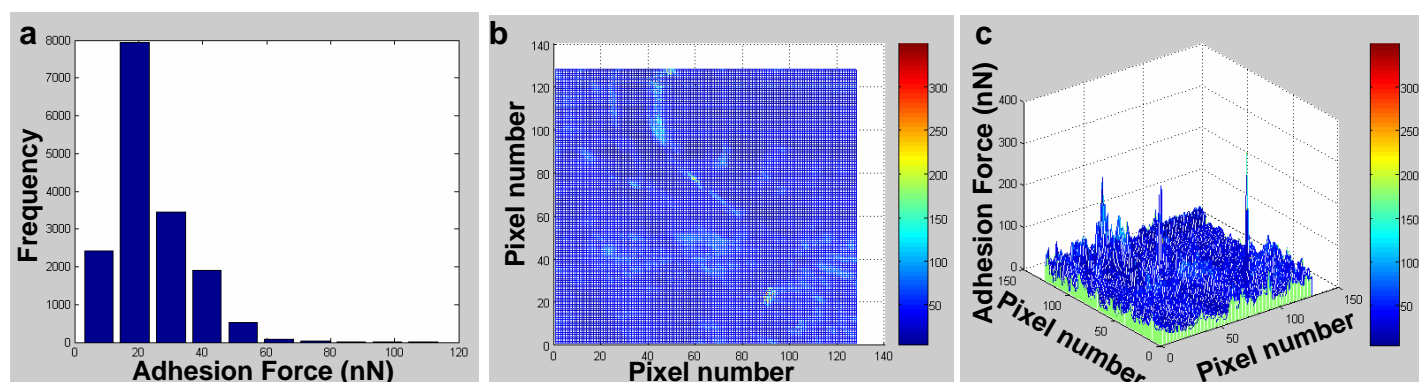

S.18 Part (a) is a histogram showing the distribution of forces extracted from the FV image in figure S.17. Part (b) is the adhesion map for the same FV image. Part (c) is a 3D wireframe plot where the x and y axis correspond to pixel numbers and the z axis to the adhesion force. The color Z scale in parts (b) and (c) is in nN .



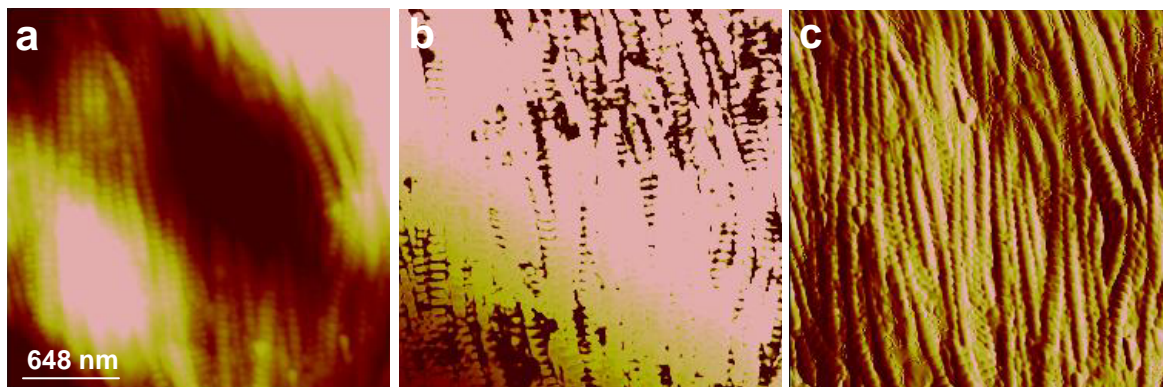

S.19 Tapping mode AFM images in air. Height (a), phase (b), and amplitude images for a region away from the optic nerve. The image was collected from a sample labeled as A7.

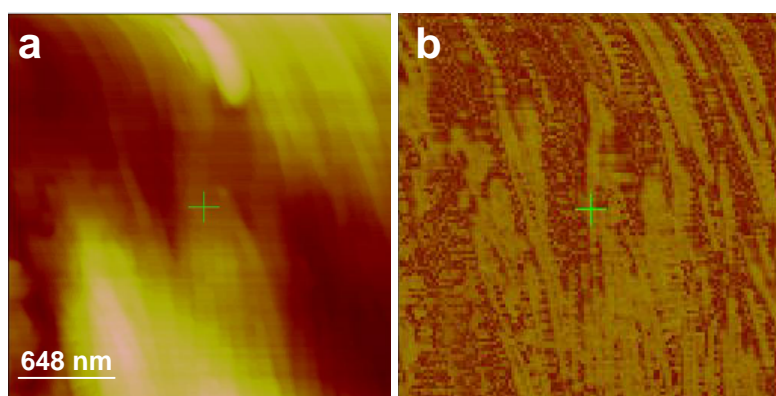

S.20 Topography (a) and a FV image (b) of an area away from the optic nerve. The data was collected from a sample labeled as A7.

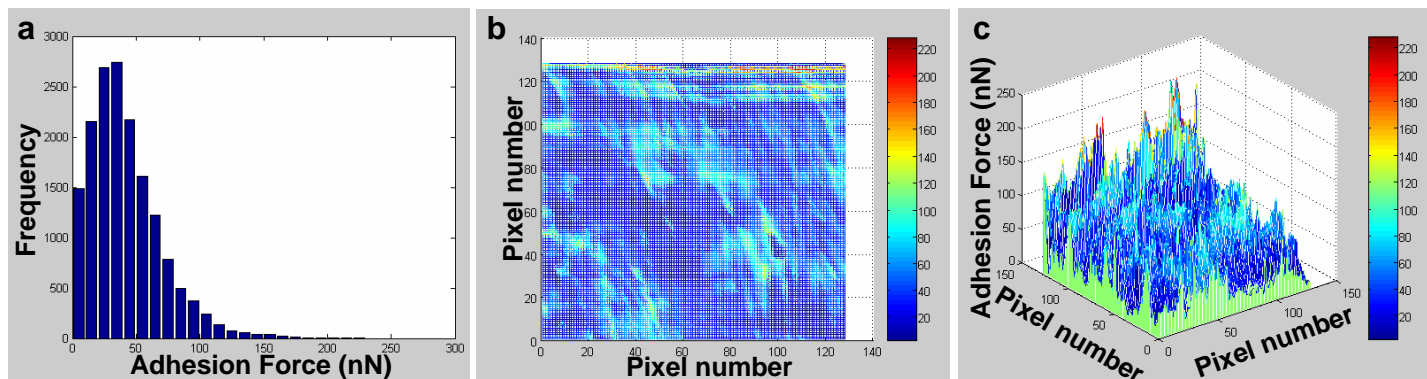

S.21 Part (a) is a histogram showing the distribution of forces extracted from the FV image in figure S.20. Part (b) is the adhesion map for the same FV image. Part (c) is a 3D wireframe plot where the x and y axis correspond to pixel numbers and the z axis to the adhesion force. The color Z scale in parts (b) and (c) is in nN .



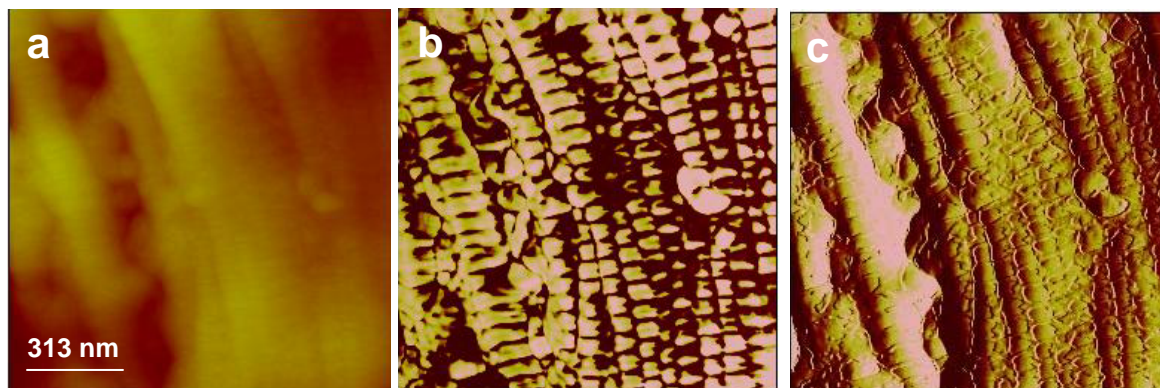

S.22 Tapping mode AFM images in air. Height (a), phase (b), and amplitude images for a region away from the optic nerve. The image was collected from a sample labeled as A8.

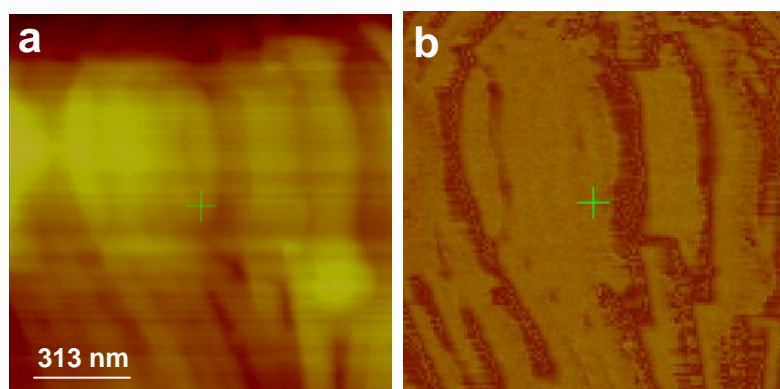

S.23 Topography (a) and a FV image (b) of an area away from the optic nerve. The data was collected from a sample labeled as A8.

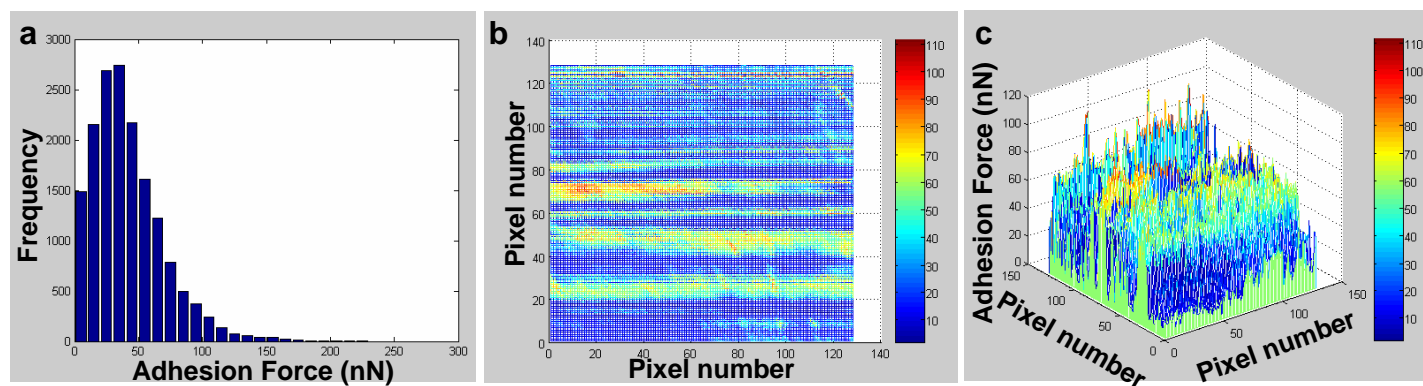

S.24 Part (a) is a histogram showing the distribution of forces extracted from the FV image in figure S.23. Part (b) is the adhesion map for the same FV image. Part (c) is a 3D wireframe plot where the x and y axis correspond to pixel numbers and the z axis to the adhesion force. The color Z scale in parts (b) and (c) is in nN .

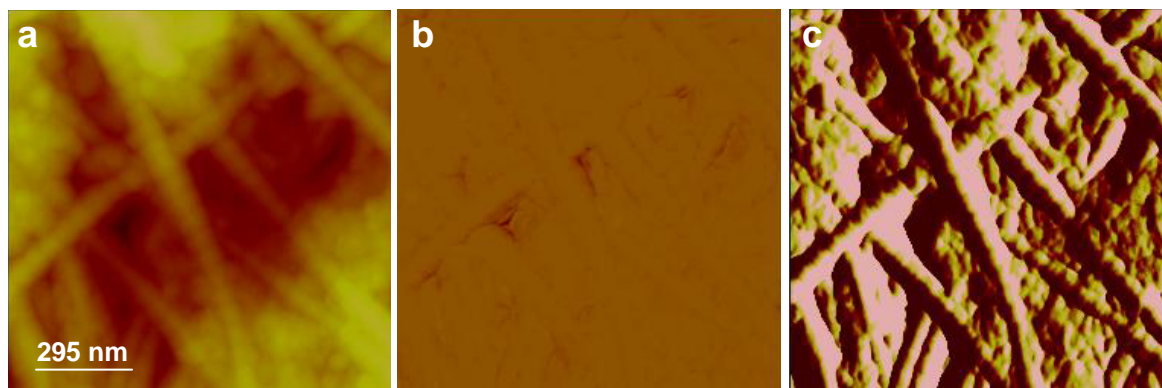

S.25 Tapping mode AFM images in air. Height (a), phase (b), and amplitude images for a region away from the optic nerve. The image was collected from a sample labeled as A9.

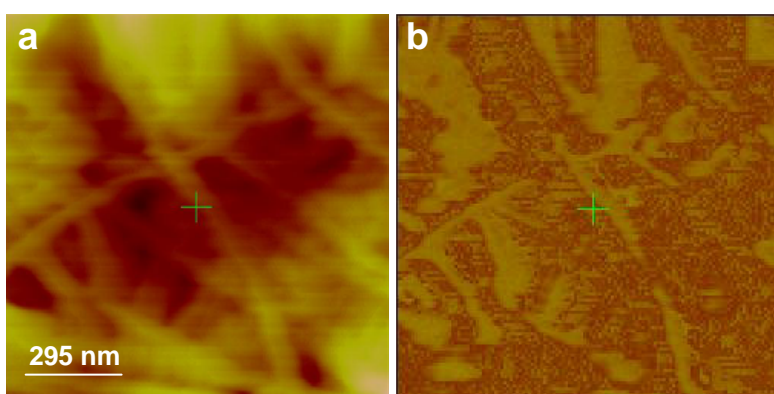

S.26 Topography (a) and a FV image (b) of an area away from the optic nerve. The data was collected from a sample labeled as A9.

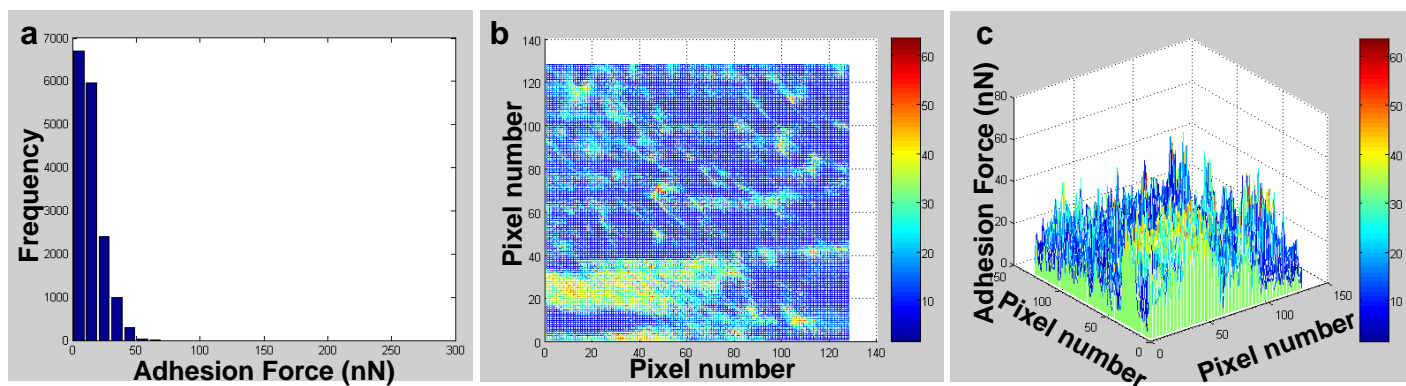

S.27 Part (a) is a histogram showing the distribution of forces extracted from the FV image in figure S.26. Part (b) is the adhesion map for the same FV image. Part (c) is a 3D wireframe plot where the x and y axis correspond to pixel numbers and the z axis to the adhesion force. The color Z scale in parts (b) and (c) is in nN .

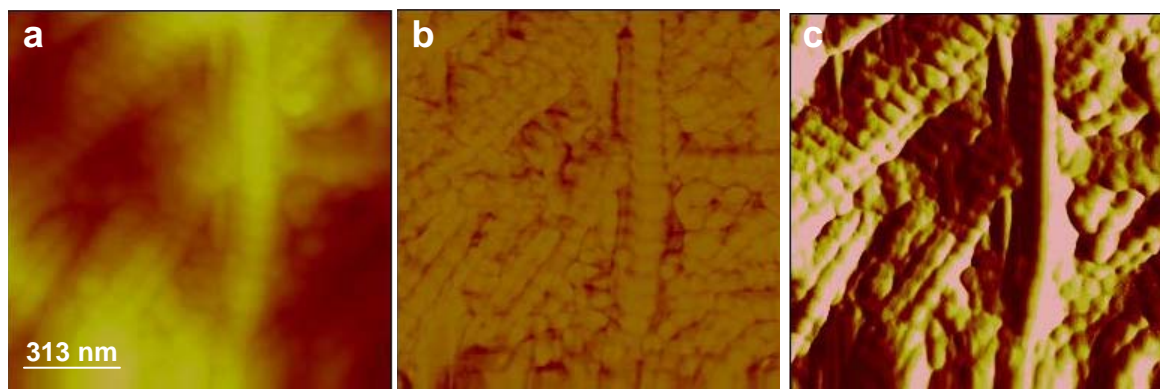

S.28 Tapping mode AFM images in air. Height (a), phase (b), and amplitude images for a region away from the optic nerve. The image was collected from a sample labeled as A10.

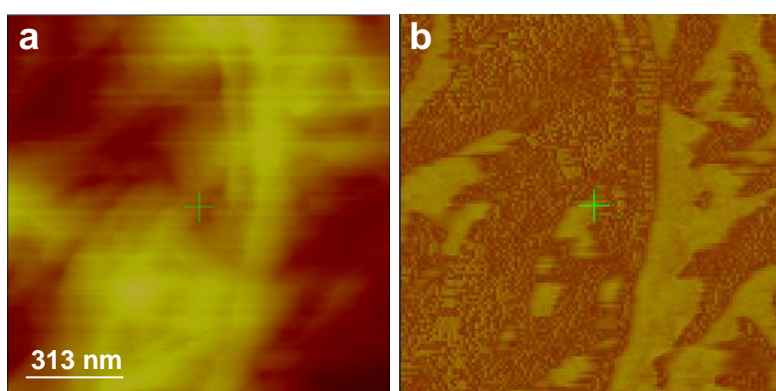

S.29 Topography (a) and a FV image (b) of an area away from the optic nerve. The data was collected from a sample labeled as A10.

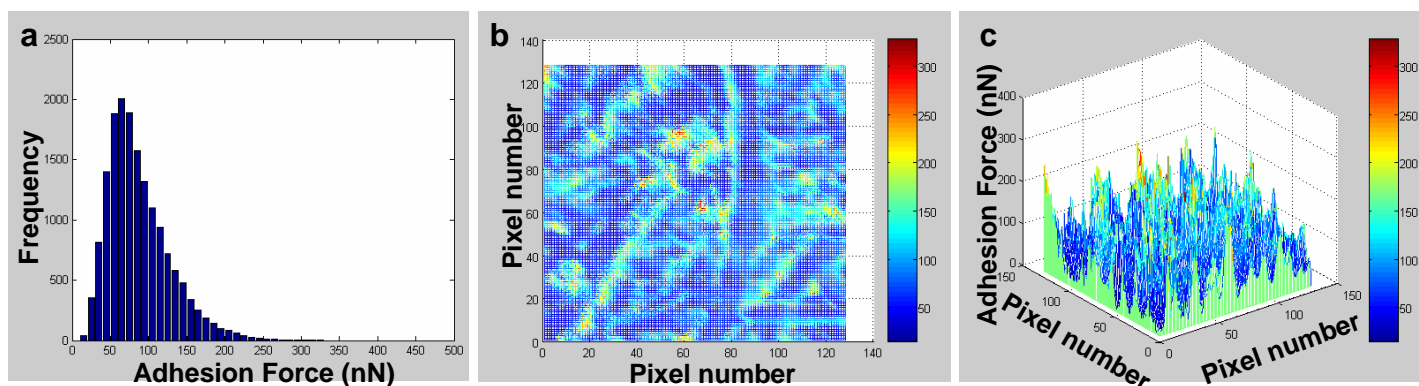

S.30 Part (a) is a histogram showing the distribution of forces extracted from the FV image in figure S.29. Part (b) is the adhesion map for the same FV image. Part (c) is a 3D wireframe plot where the x and y axis correspond to pixel numbers and the z axis to the adhesion force. The color Z scale in parts (b) and (c) is in nN .



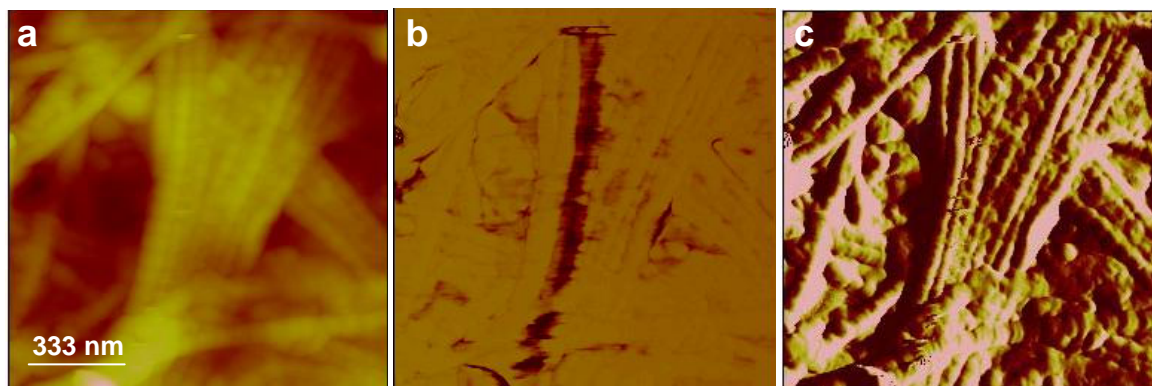

S.31 Tapping mode AFM images in air. Height (a), phase (b), and amplitude images for a region away from the optic nerve. The image was collected from a sample labeled as A11.

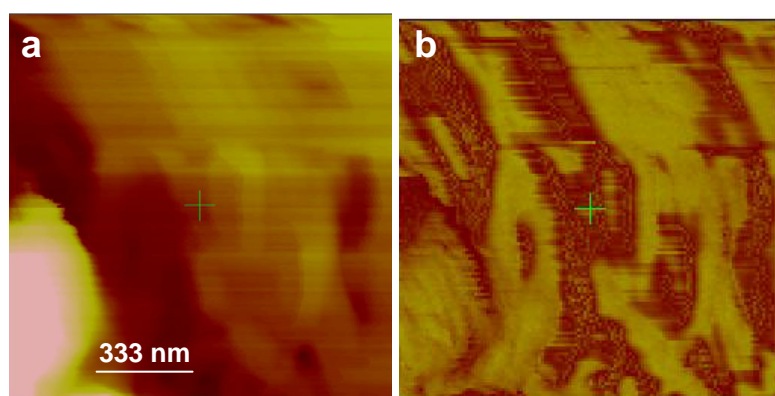

S.32 Topography (a) and a FV image (b) of an area away from the optic nerve. The data was collected from a sample labeled as A11.

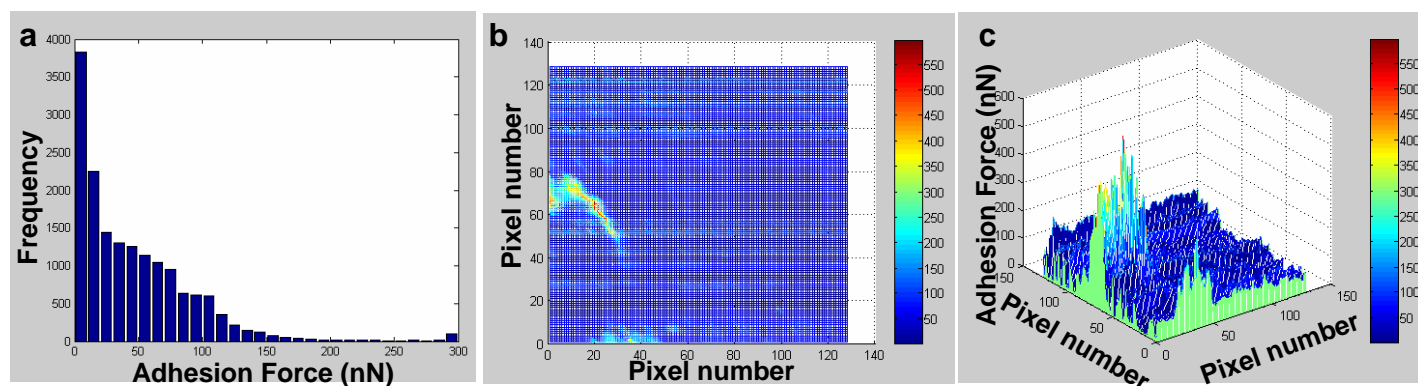

S.33 Part (a) is a histogram showing the distribution of forces extracted from the FV image in figure S.32. Part (b) is the adhesion map for the same FV image. Part (c) is a 3D wireframe plot where the x and y axis correspond to pixel numbers and the z axis to the adhesion force. The color Z scale in parts (b) and (c) is in nN .

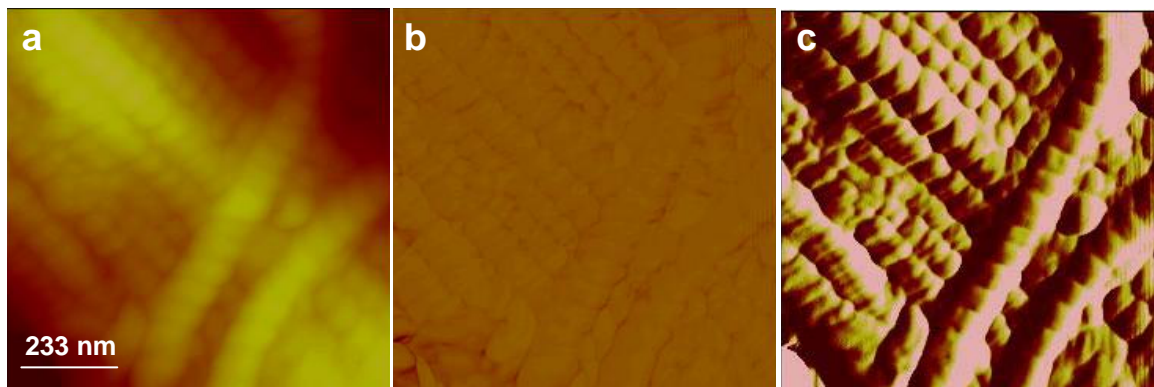

S.34 Tapping mode AFM images in air. Height (a), phase (b), and amplitude images for a region away from the optic nerve. The image was collected from a sample labeled as A12.

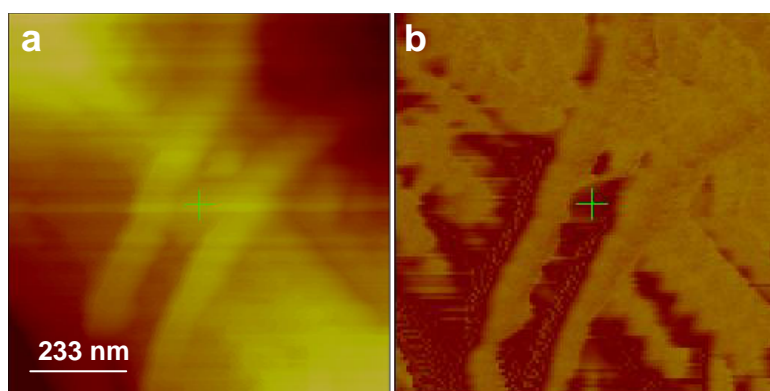

S.35 Topography (a) and a FV image (b) of an area away from the optic nerve. The data was collected from a sample labeled as A12.

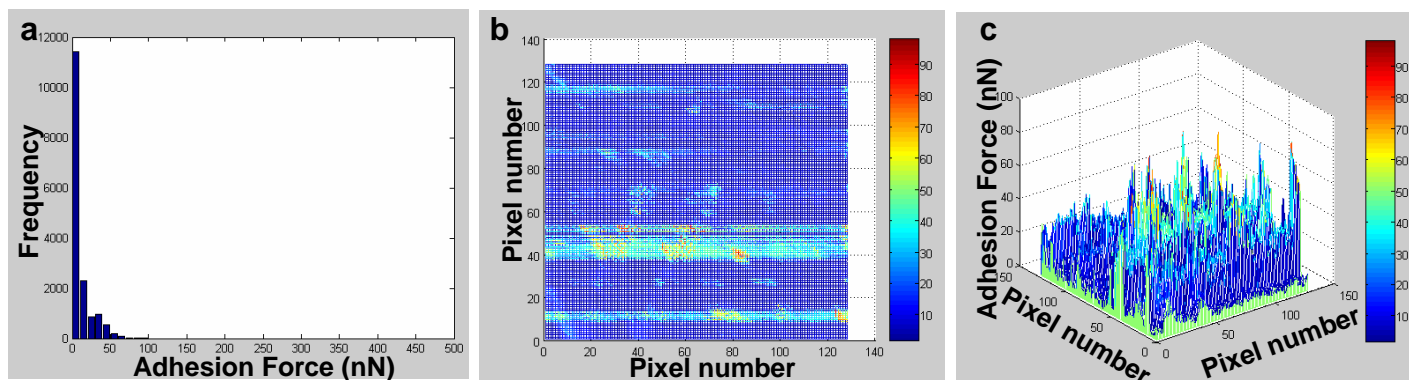

S.36 Part (a) is a histogram showing the distribution of forces extracted from the FV image in figure S.35. Part (b) is the adhesion map for the same FV image. Part (c) is a 3D wireframe plot where the x and y axis correspond to pixel numbers and the z axis to the adhesion force. The color Z scale in parts (b) and (c) is in nN .

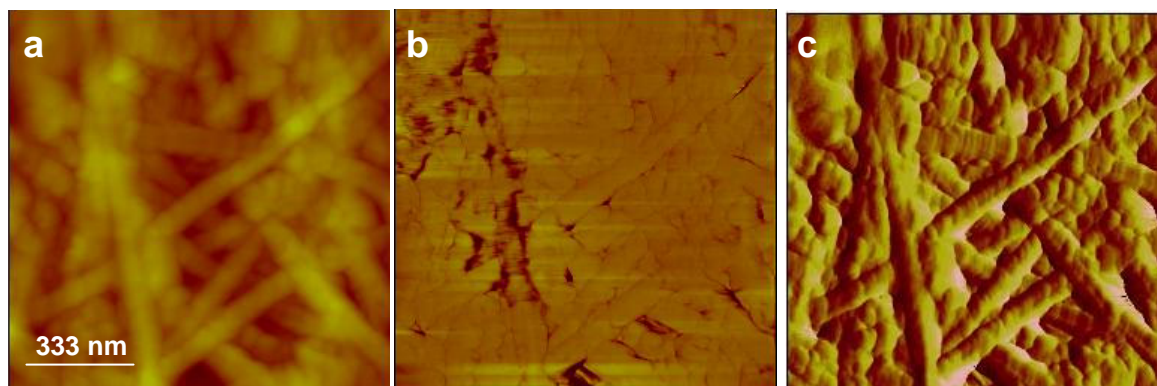

S.37 Tapping mode AFM images in air. Height (a), phase (b), and amplitude images for a region close to the optic nerve. The image was collected from a sample labeled as O1.

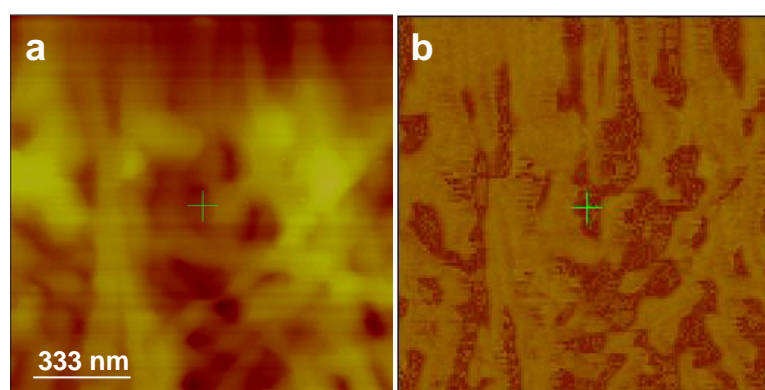

S.38 Topography (a) and a FV image (b) of an area close to the optic nerve. The data was collected from a sample labeled as O1.

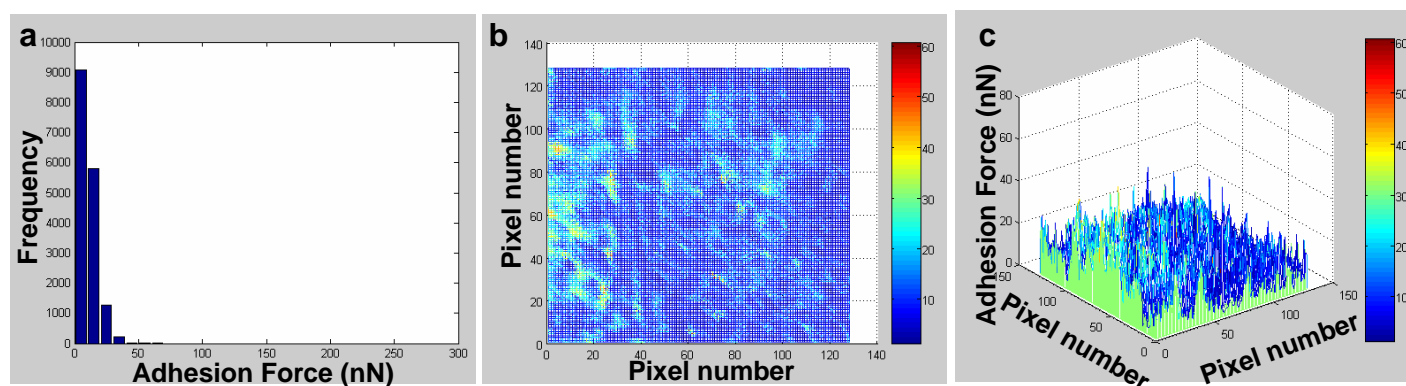

S.39 Part (a) is a histogram showing the distribution of forces extracted from the FV image in figure S.38. Part (b) is the adhesion map for the same FV image. Part (c) is a 3D wireframe plot where the x and y axis correspond to pixel numbers and the z axis to the adhesion force. The color Z scale in parts (b) and (c) is in nN .



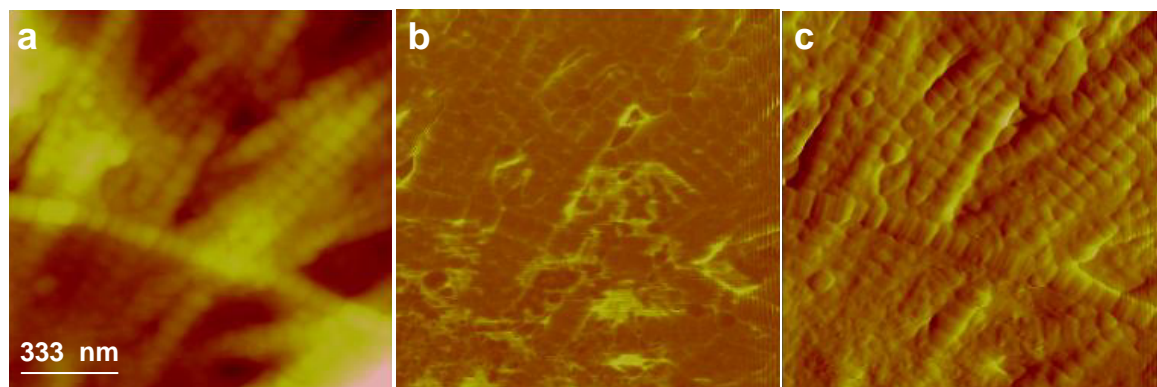

S.40 Tapping mode AFM images in air. Height (a), phase (b), and amplitude images for a region close to the optic nerve. The image was collected from a sample labeled as O2.

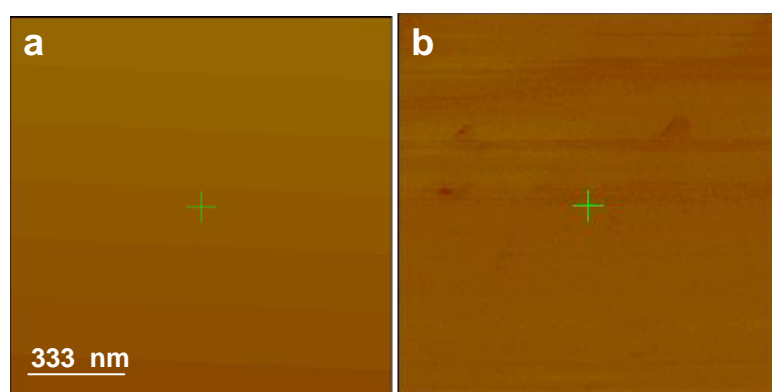

S.41 Topography (a) and a FV image (b) of an area close to the optic nerve. The data was collected from a sample labeled as O2.

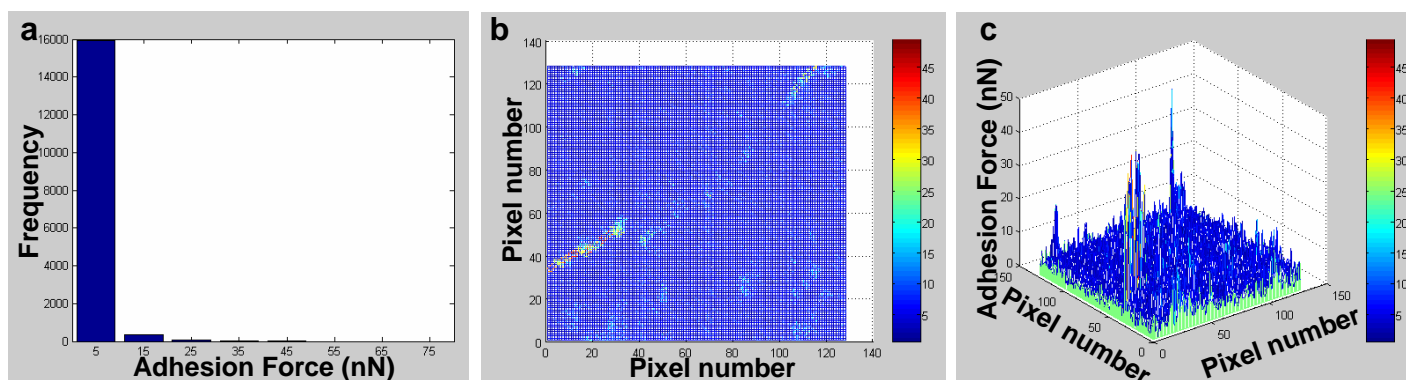

S.42 Part (a) is a histogram showing the distribution of forces extracted from the FV image in figure S.41. Part (b) is the adhesion map for the same FV image. Part (c) is a 3D wireframe plot where the x and y axis correspond to pixel numbers and the z axis to the adhesion force. The color Z scale in parts (b) and (c) is in nN .

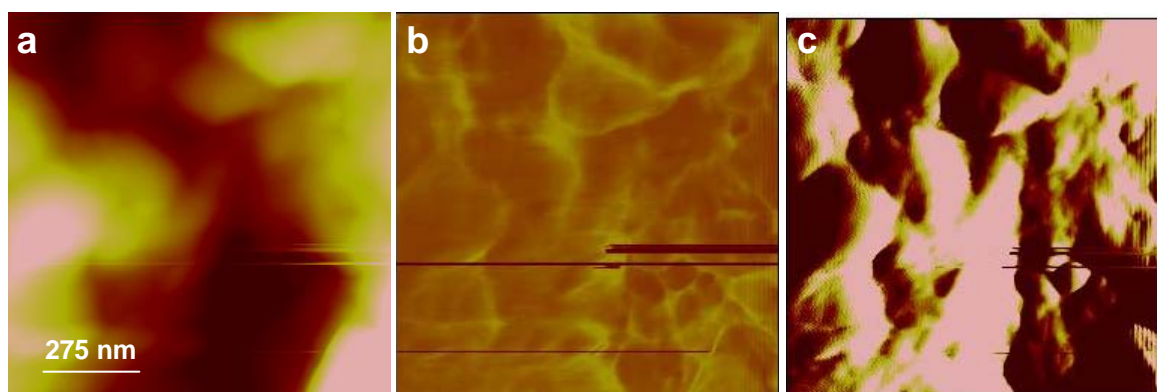

S.43 Tapping mode AFM images in air. Height (a), phase (b), and amplitude images for a region close to the optic nerve. The image was collected from a sample labeled as O3.

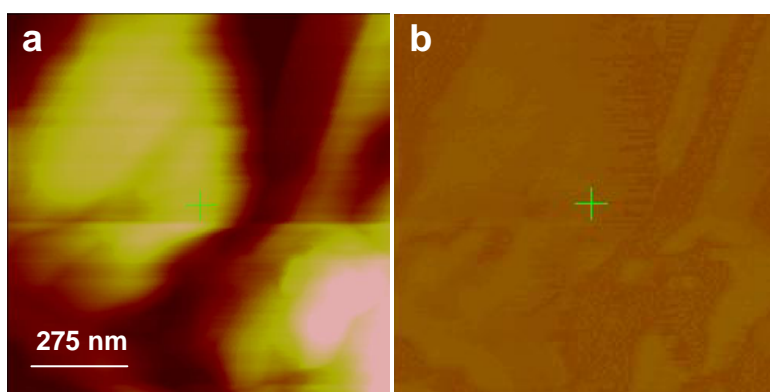

S.44 Topography (a) and a FV image (b) of an area close to the optic nerve. The data was collected from a sample labeled as O3.

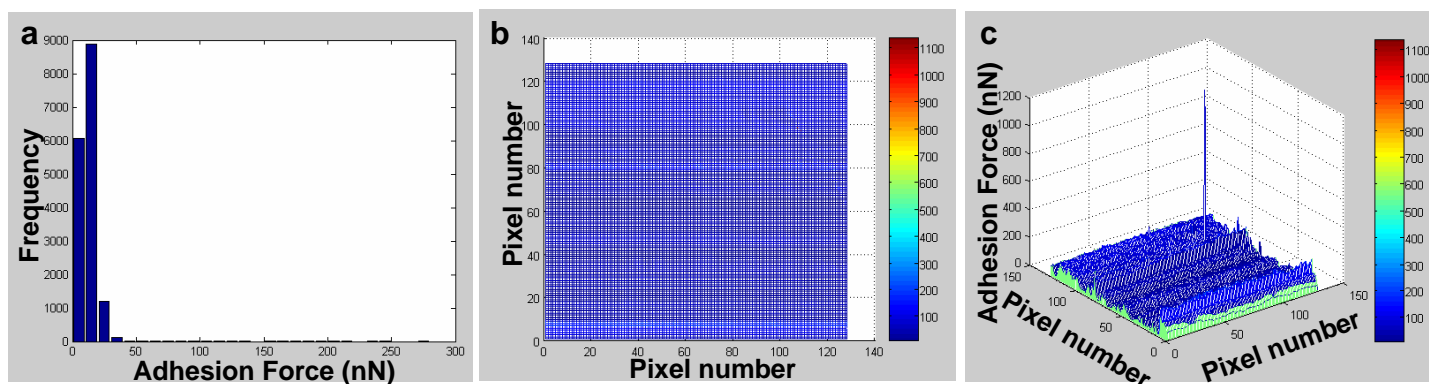

S.45 Part (a) is a histogram showing the distribution of forces extracted from the FV image in figure S.44. Part (b) is the adhesion map for the same FV image. Part (c) is a 3D wireframe plot where the x and y axis correspond to pixel numbers and the z axis to the adhesion force. The color Z scale in parts (b) and (c) is in nN .

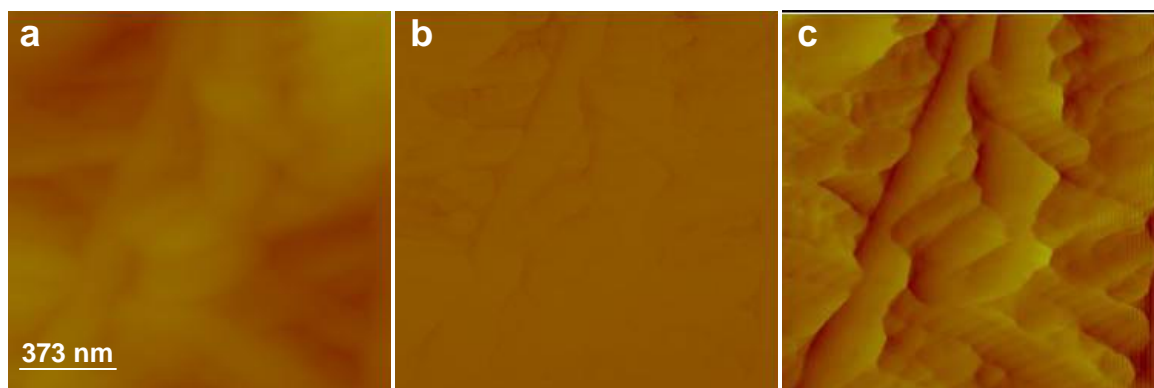

S.46 Tapping mode AFM images in air. Height (a), phase (b), and amplitude images for a region close to the optic nerve. The image was collected from a sample labeled as O4.

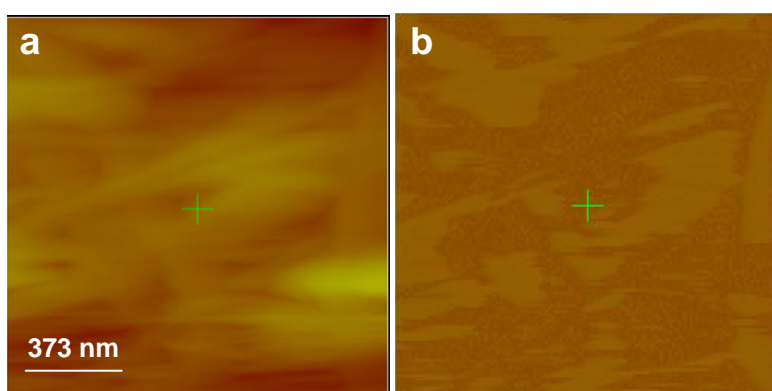

S.47 Topography (a) and a FV image (b) of an area close to the optic nerve. The data was collected from a sample labeled as O4.

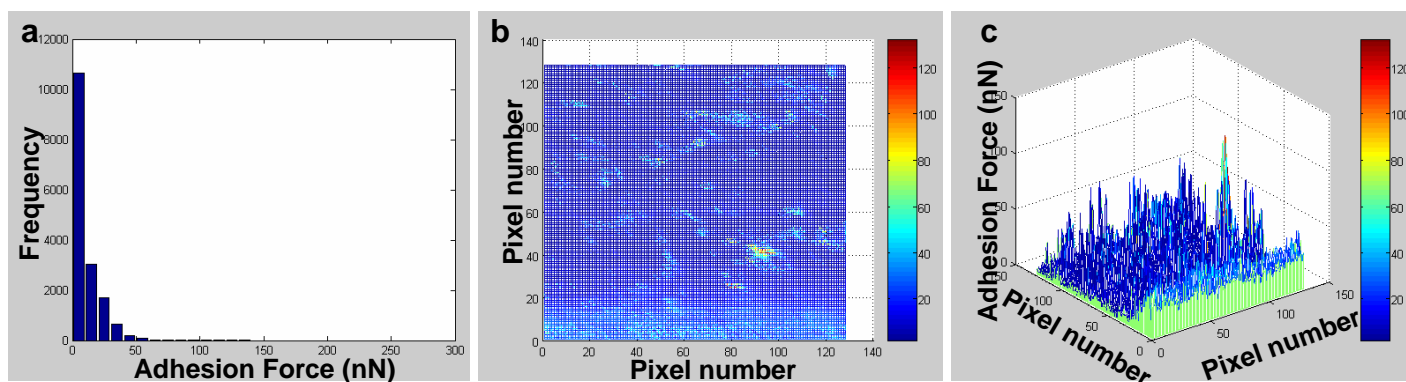

S.48 Part (a) is a histogram showing the distribution of forces extracted from the FV image in figure S.47. Part (b) is the adhesion map for the same FV image. Part (c) is a 3D wireframe plot where the x and y axis correspond to pixel numbers and the z axis to the adhesion force. The color Z scale in parts (b) and (c) is in nN .



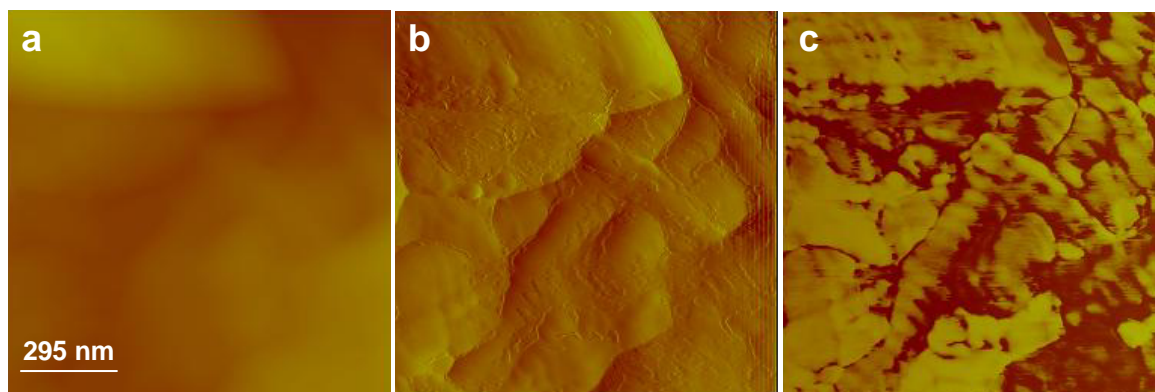

S.49 Tapping mode AFM images in air. Height (a), phase (b), and amplitude images for a region close to the optic nerve. The image was collected from a sample labeled as O5.

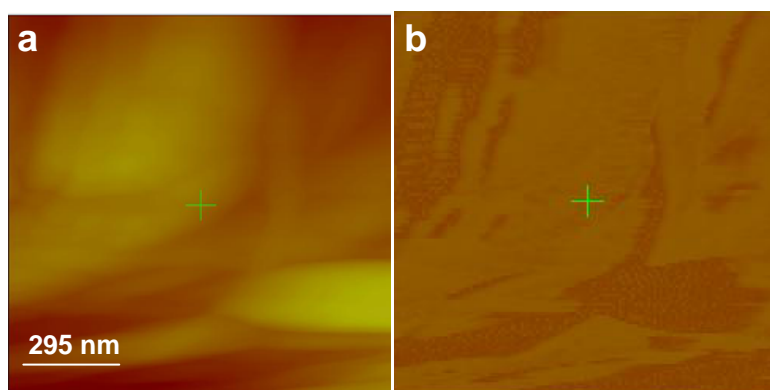

S.50 Topography (a) and a FV image (b) of an area close to the optic nerve. The data was collected from a sample labeled as O5.

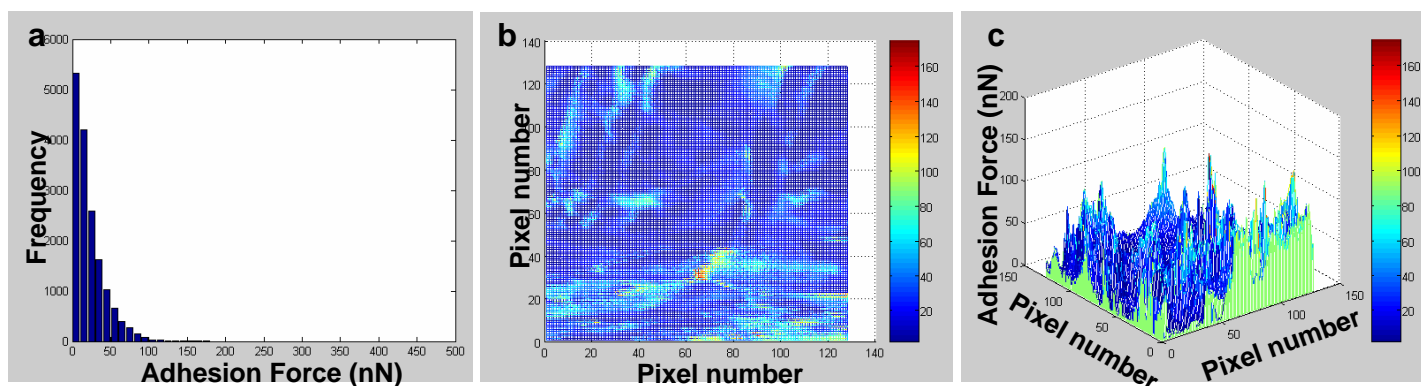

S.51 Part (a) is a histogram showing the distribution of forces extracted from the FV image in figure S.50. Part (b) is the adhesion map for the same FV image. Part (c) is a 3D wireframe plot where the x and y axis correspond to pixel numbers and the z axis to the adhesion force. The color Z scale in parts (b) and (c) is in nN .

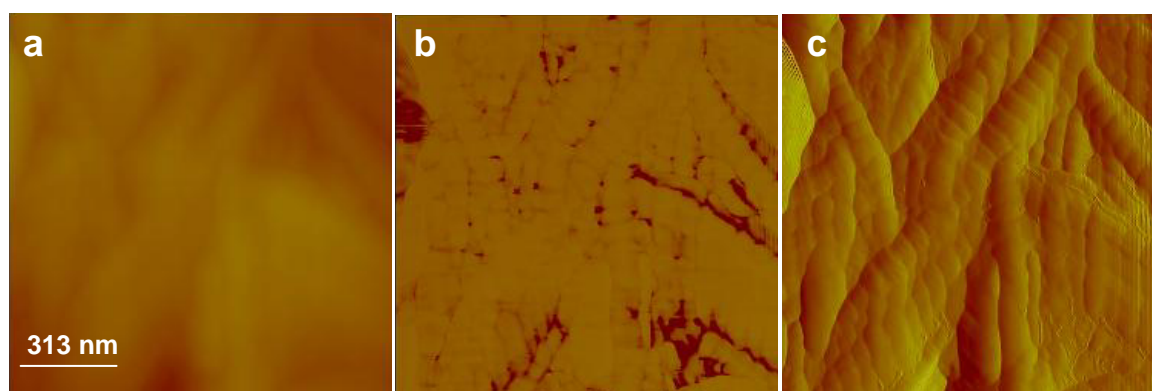

S.52 Tapping mode AFM images in air. Height (a), phase (b), and amplitude images for a region close to the optic nerve. The image was collected from a sample labeled as O6.

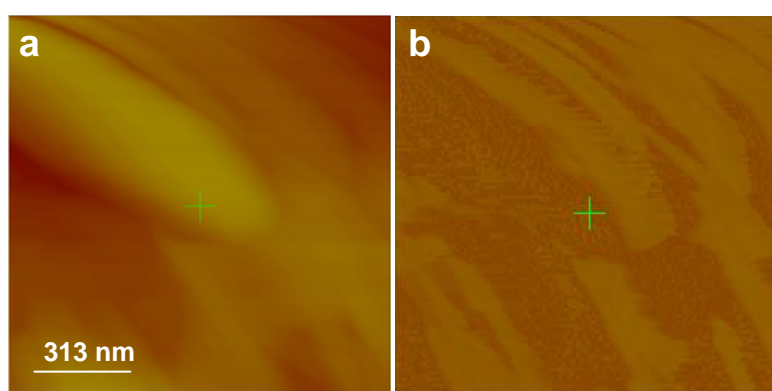

S.53 Topography (a) and a FV image (b) of an area close to the optic nerve. The data was collected from a sample labeled as O6.

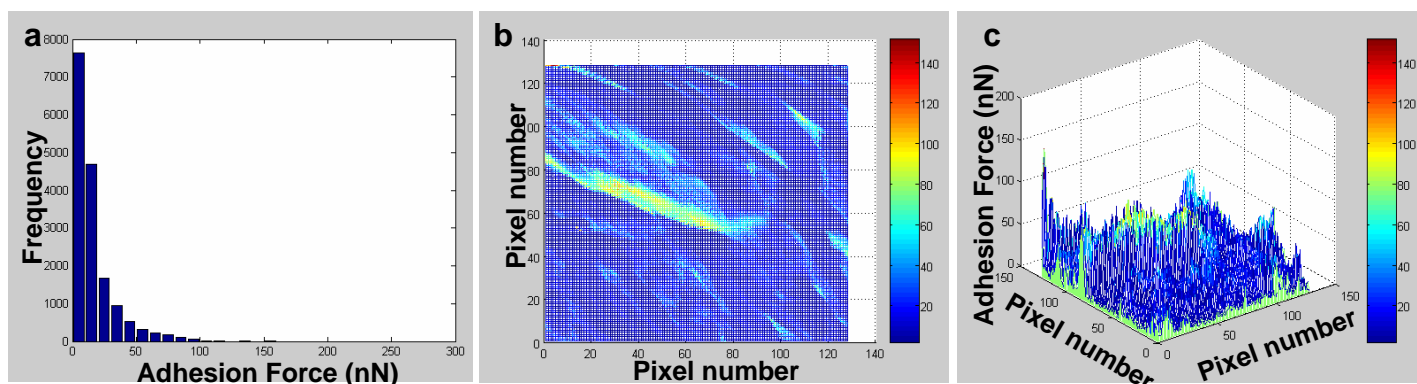

S.54 Part (a) is a histogram showing the distribution of forces extracted from the FV image in figure S.53. Part (b) is the adhesion map for the same FV image. Part (c) is a 3D wireframe plot where the x and y axis correspond to pixel numbers and the z axis to the adhesion force. The color Z scale in parts (b) and (c) is in nN .

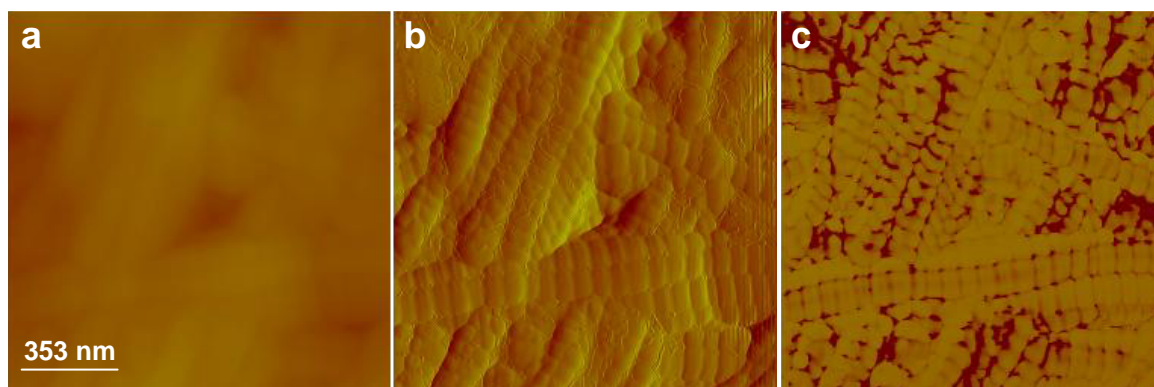

S.55 Tapping mode AFM images in air. Height (a), phase (b), and amplitude images for a region close to the optic nerve. The image was collected from a sample labeled as O7.

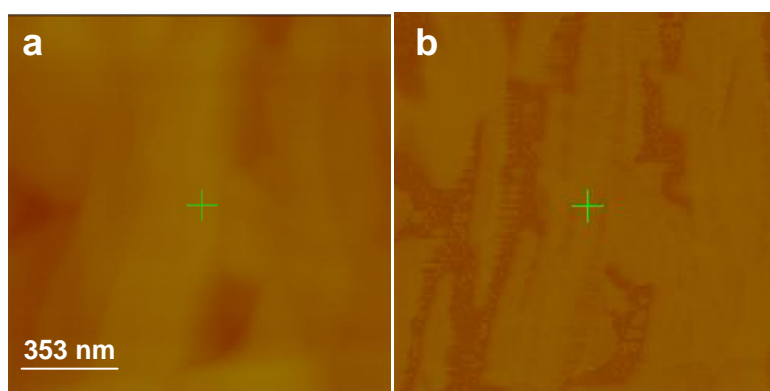

S.56 Topography (a) and a FV image (b) of an area close to the optic nerve. The data was collected from a sample labeled as O7.

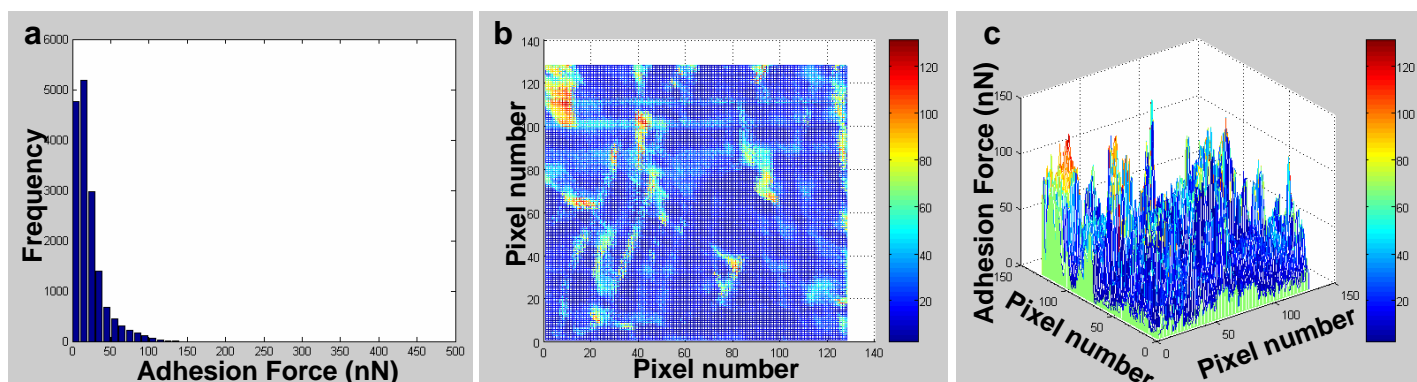

S.57 Part (a) is a histogram showing the distribution of forces extracted from the FV image in figure S.56. Part (b) is the adhesion map for the same FV image. Part (c) is a 3D wireframe plot where the x and y axis correspond to pixel numbers and the z axis to the adhesion force. The color Z scale in parts (b) and (c) is in nN .



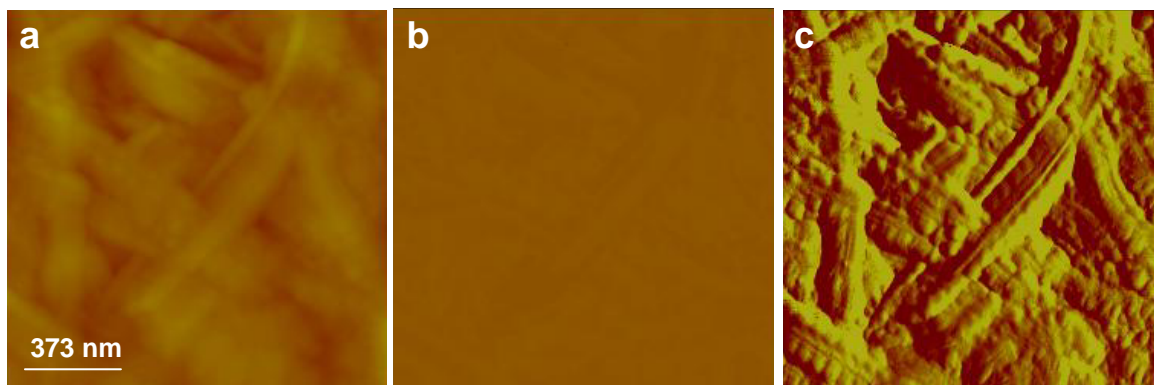

S.58 Tapping mode AFM images in air. Height (a), phase (b), and amplitude images for a region close to the optic nerve. The image was collected from a sample labeled as O8.

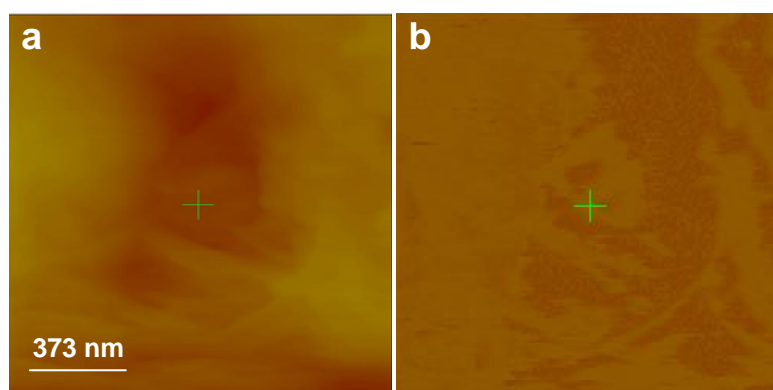

S.59 Topography (a) and a FV image (b) of an area close to the optic nerve. The data was collected from a sample labeled as O8.

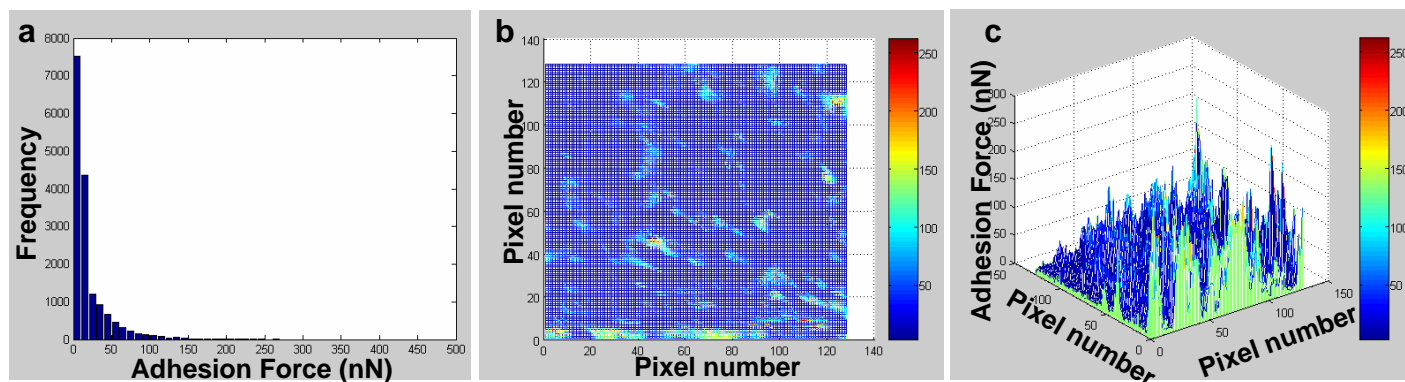

S.60 Part (a) is a histogram showing the distribution of forces extracted from the FV image in figure S.59. Part (b) is the adhesion map for the same FV image. Part (c) is a 3D wireframe plot where the x and y axis correspond to pixel numbers and the z axis to the adhesion force. The color Z scale in parts (b) and (c) is in nN .

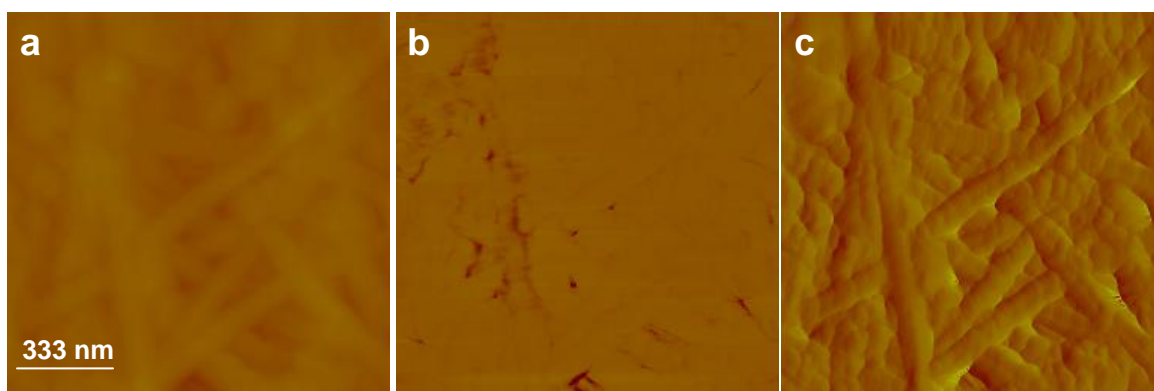

S.61 Tapping mode AFM images in air. Height (a), phase (b), and amplitude images for a region close to the optic nerve. The image was collected from a sample labeled as O9.

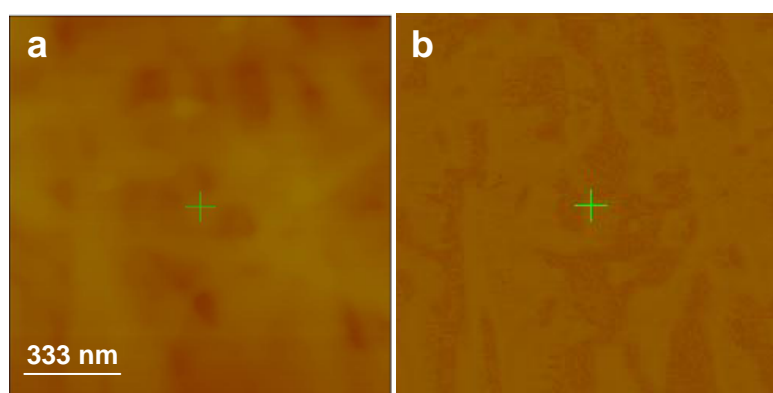

S.62 Topography (a) and a FV image (b) of an area close to the optic nerve. The data was collected from a sample labeled as O9.

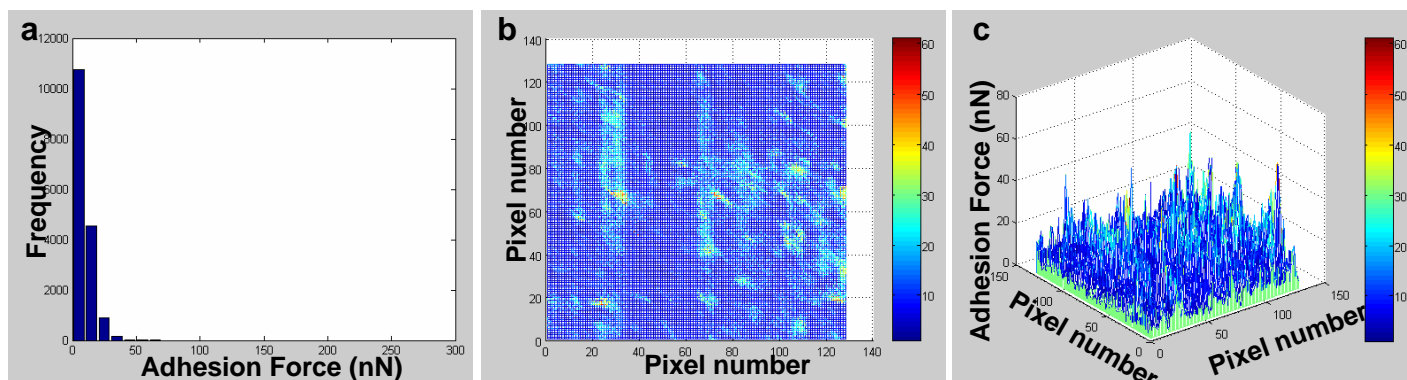

S.63 Part (a) is a histogram showing the distribution of forces extracted from the FV image in figure S.62. Part (b) is the adhesion map for the same FV image. Part (c) is a 3D wireframe plot where the x and y axis correspond to pixel numbers and the z axis to the adhesion force. The color Z scale in parts (b) and (c) is in nN .
